# Supplementary material for: Loss of CENP-F Results in Dilated Cardiomyopathy with Severe Disruption of Cardiac Myocyte Architecture
Source: PubMed Central journal article supplement (PMC5953941; doi:10.1038/s41598-018-25774-1), 2018-05-15
Supplement: 41598_2018_25774_MOESM1_ESM.pdf [file 41598_2018_25774_MOESM1_ESM.pdf]

# **Loss of CENP-F Results in Dilated Cardiomyopathy with Severe Disruption of Cardiac Myocyte Architecture**

Annabelle Manalo<sup>1</sup>, Alison K. Schroer<sup>2</sup>, Aidan M. Fenix<sup>1</sup>, Zoe Shancer<sup>3</sup>, John Coogan<sup>3</sup>, Tanner Brolsma<sup>3</sup>, Dylan T. Burnette<sup>1</sup>, W. David Merryman<sup>2</sup>, David M. Bader<sup>1,3\*</sup>

**Supplementary Figures**

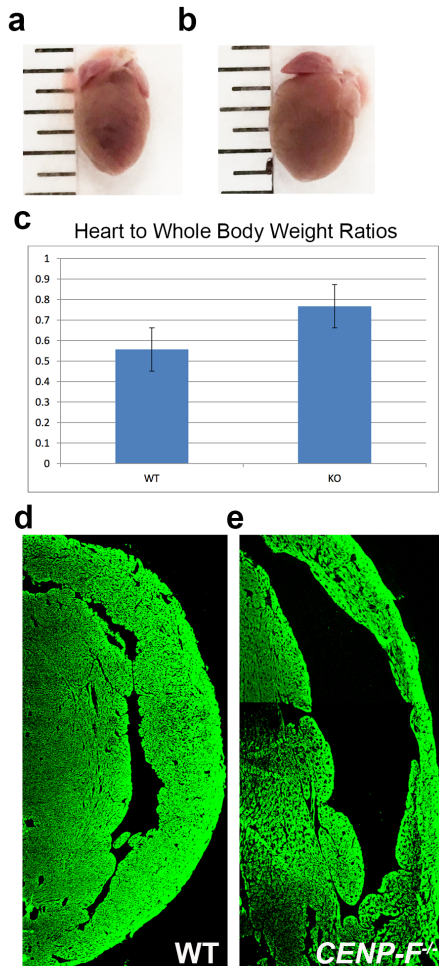

**Supplemental Figure 1. The loss of CENP-F leads to enlargement/dilation of hearts in adult mice.**

Isolated adult hearts from wild-type (**a**) and *CENP-F*<sup>-/-</sup> (**b**) mice are measured in inches. All hearts (100%) isolated from *CENP-F*<sup>-/-</sup> animals were enlarged when compared to hearts taken from wild-type mice (**b**). *n*=10 per group. Ten animals per group were weighed as were their hearts after euthanasia and immediate extraction. Percent heart to whole body weight is given for wild-type and *CENP-F*<sup>-/-</sup> groups and this ratio was increased in the *CENP-F*<sup>-/-</sup> group (**c**) *n*=10. \**p*<0.005. Error bars represent SEM; statistical analysis was performed using the TTEST tool in Excel programming. A composite image of MF20 stained tissue sections displaying the right ventricle of an adult wild-type heart (**d**). A composite image of MF20 stained tissue sections of the right ventricle in an enlarged *CENP-F*<sup>-/-</sup> heart, demonstrates ventricular dilation and a thinned wall (**e**) *n*=10.

**a**

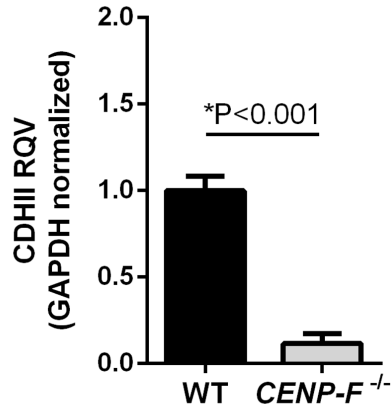

**b**

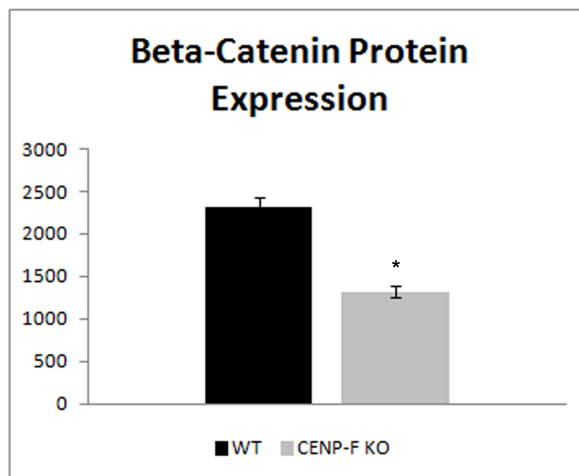

**Supplemental Figure 2. Gene expression changes of the cardiomyocyte junctional proteins with loss of CENP-F.** The level of n-cadherin is significantly decreased in CENP-F<sup>-/-</sup> cardiomyocytes when compared to wild-type (a). A western blot analysis of beta-catenin protein expression is significantly decreased in CENP-F<sup>-/-</sup> vs. wild-type cardiomyocytes (b)  $p < 0.05$ ,  $n = 5$ , error bars = (SEM).

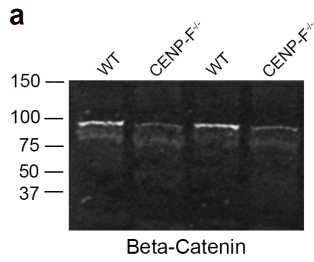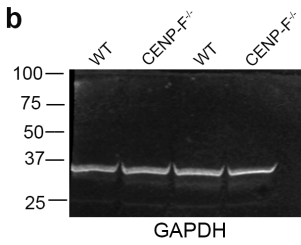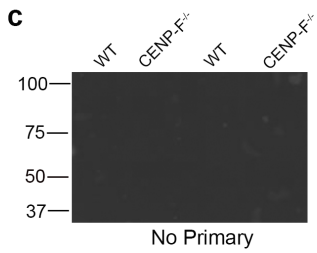

**Supplemental Figure 3. Full-length Western Blot of Beta-Catenin shows a significant decrease in *CENP-F*<sup>-/-</sup> cardiomyocytes.** A western blot analysis (n=5) shows that loss of CENP-F results in a decrease of beta-catenin expression (**a**). GAPDH represents a positive control for all western blot analysis (**b**). No primary represents a negative control for all western blot analysis (**c**).

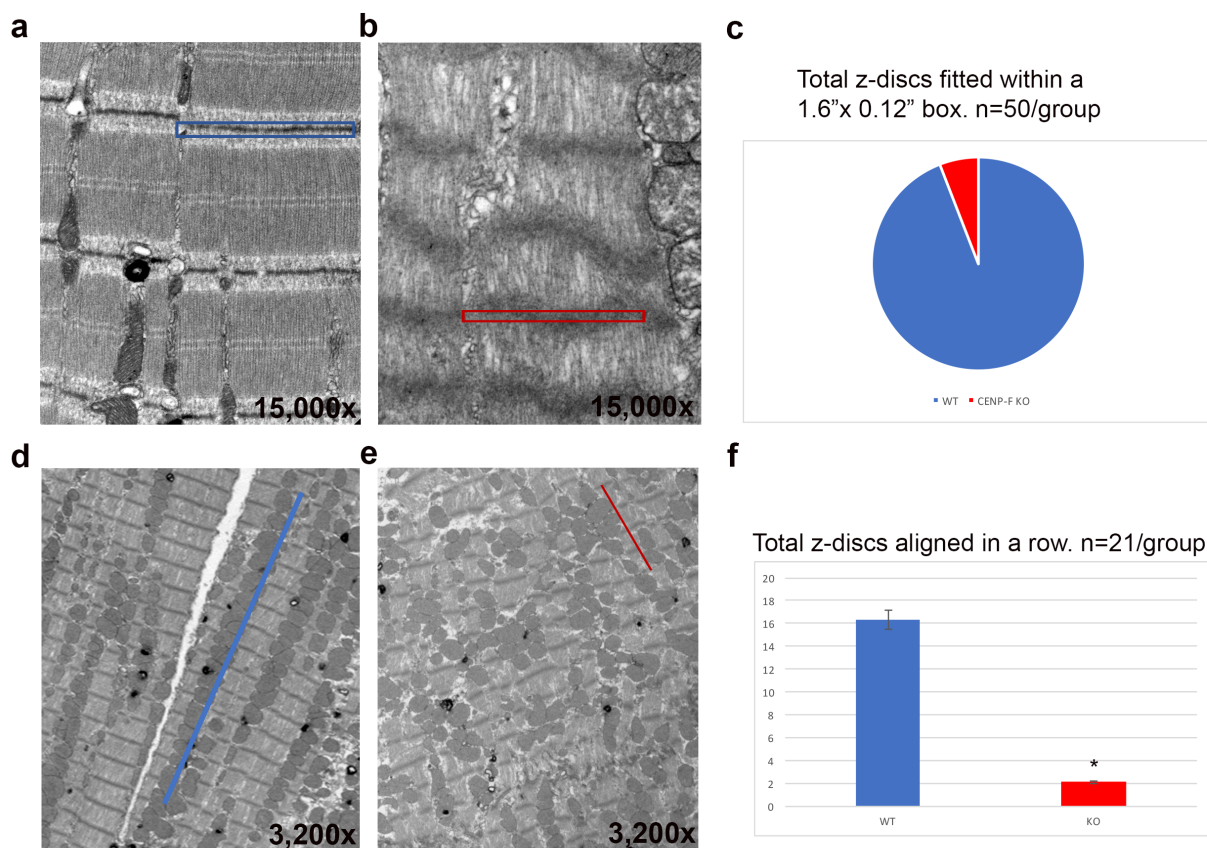

**Supplemental Figure 4. Z-discs lose straight and aligned phenotype in *CENP-F*<sup>-/-</sup> cardiomyocytes.** A 1.6" x 0.12" box can fit 96% of wild-type z-discs (**a**) and only 3 out of 50 of the *CENP-F*<sup>-/-</sup> z-discs could fit (**b**)(**c**). As many as 17 z-discs can be counted in a row in wild-type TEM heart images (**d**). No more than 4 z-discs are aligned in *CENP-F*<sup>-/-</sup> sarcomeres (**e**)(**f**). n=21, \**p*<0.005. Error bars represent SEM.

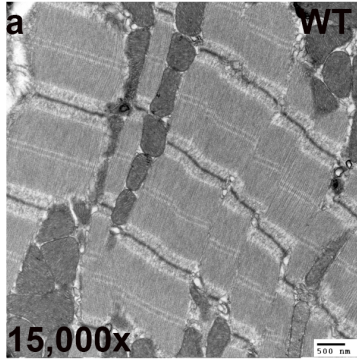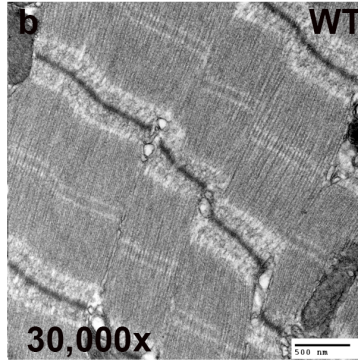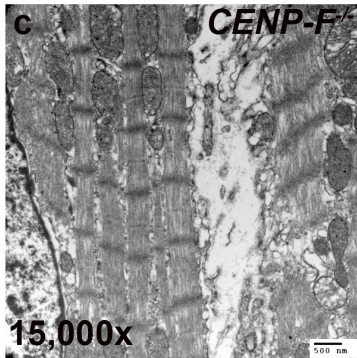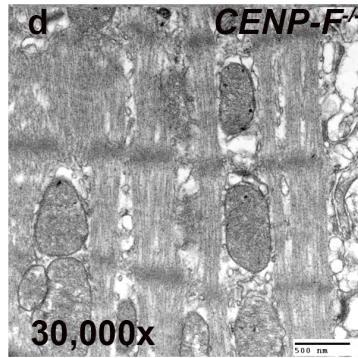

**Supplemental Figure 5. The distance between z-discs is shortened in loss of CENP-F hearts.** Representative images of sarcomeres in *CENP-F*<sup>+/+</sup> (a and b) and *CENP-F*<sup>-/-</sup> (c and d) hearts demonstrate the shortening of these structures in knockout animals. The sarcomeric distance between z-discs and z-disc thickness was measured in myofibrils with at least four consecutive z-discs (**See Fig. 3 c and d**). 100 sarcomeres were measured per group from 3 hearts.

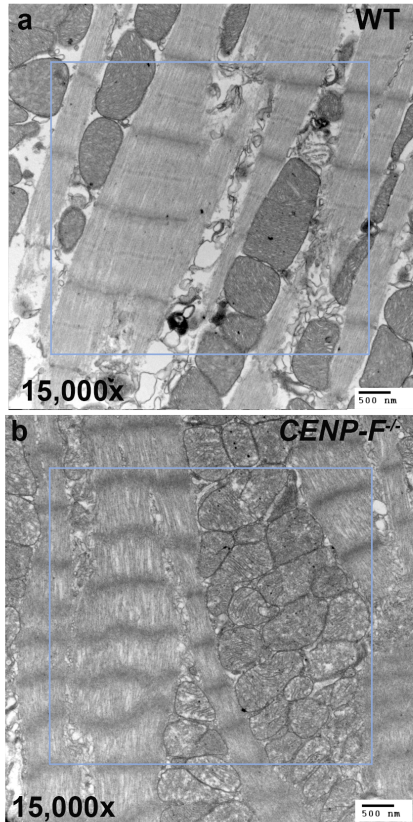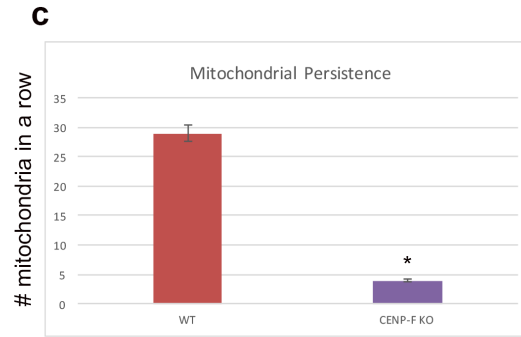

**Supplemental Figure 6. Mitochondria are misaligned with loss of CENP-F in TEM images of the heart.** In a given area (box), the persistence of mitochondria in wild-type hearts that are aligned within the sarcomeric structures averages at 29 in a row **(a)(c)**. Without CENP-F, there is a significant decrease in mitochondrial alignment averaging only 4 in a row **(b)(c)**. \* $p < 0.001$ , Error bars represent (SEM).

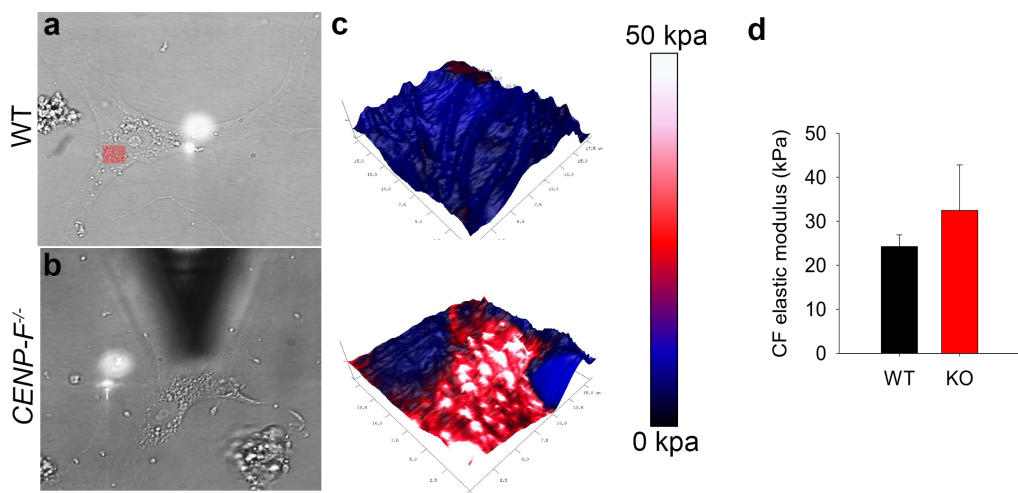

**Supplemental Figure 7. Cardiac Fibroblasts are stiffened with the loss of CENP-F.** Live cardiac fibroblasts isolated from wild-type (a) and *CENP-F*<sup>-/-</sup> (b) mice were plated and analyzed for the elastic modulus of the cell surface. Representative topography plots (colorbar) show a soft surface across the 3D rendering of the wild-type cardiac fibroblast (blue), while, the *CENP-F*<sup>-/-</sup> cardiac fibroblast (red) is stiffer (c). The average median calculation of the elastic modulus of wild-type vs. *CENP-F*<sup>-/-</sup> cardiac fibroblasts results in an increase (kPa) (d). Error bars represent (SEM).



**a**

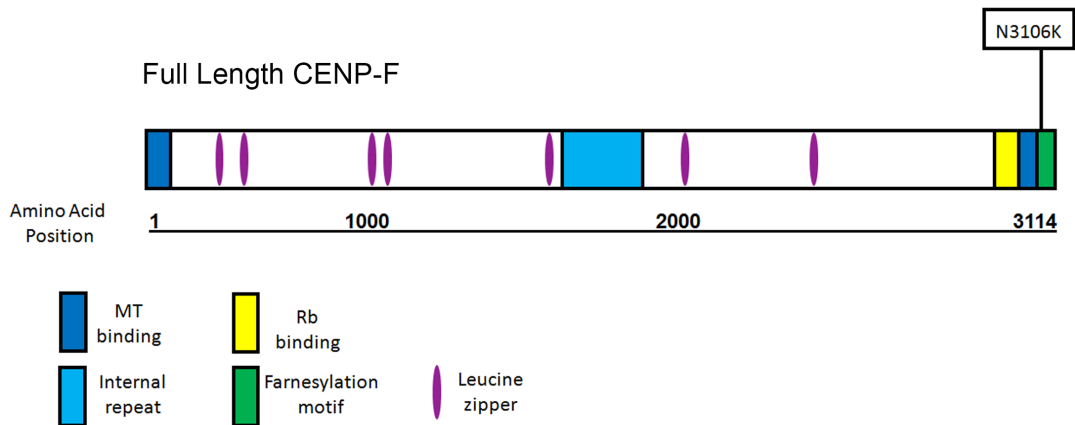

**Supplemental Figure 8. CENP-F is relevant in human cardiac disease.** In biovu, which includes 25,579 adult DNA samples, a PheWas study identified one common CENP-F variant (rs7289) associated with heart failure with reduced ejection fraction (HFrEF). The CENP-F variant (rs7289) encodes an amino acid substitution, N3106K, at the farnesylation motif (above in green) (**a**).

## Supplemental Table 1

| Supplemental Table 1 |                   |
|----------------------|-------------------|
| Transcript           | Amino Acid Change |
| NM_016343            | R300C             |
| NM_016343            | H494Q             |
| NM_016343            | M701V             |
| NM_016343            | Q754E             |
| NM_016343            | M793R             |
| NM_016343            | R815H             |
| NM_016343            | Y1018D            |
| NM_016343            | G1033R            |
| NM_016343            | T1105I            |
| NM_016343            | E1145D            |
| NM_016343            | A1208V            |
| NM_016343            | L1412S            |
| NM_016343            | A1515T            |
| NM_016343            | K1539R            |
| NM_016343            | N1703S            |
| NM_016343            | D1768N            |
| NM_016343            | R1879C            |
| NM_016343            | D1978G            |
| NM_016343            | E2011A            |
| NM_016343            | S2044L            |
| NM_016343            | A2139T            |
| NM_016343            | Q2225R            |
| NM_016343            | A2356V            |
| NM_016343            | N2396D            |

|           |        |
|-----------|--------|
| NM_016343 | R2729Q |
| NM_016343 | N3106K |
